1 **Identification of novel mutations associated with cycloserine**  
2 **resistance in *Mycobacterium tuberculosis***

3 Shuo Zhang<sup>2#</sup>, Jiazhen Chen<sup>1#\*</sup>, Peng Cui<sup>1</sup>, Wanliang Shi<sup>2</sup>, Wenhong Zhang<sup>1</sup>, Ying Zhang<sup>3\*</sup>

4 <sup>1</sup> Key Lab of Molecular Virology, Institute of Medical Microbiology, Department of Infectious  
5 Diseases, Huashan Hospital, Fudan University, Shanghai, China

6 <sup>2</sup>Department of Molecular Microbiology and Immunology, Bloomberg School of Public Health,  
7 Johns Hopkins University, Baltimore, Maryland, USA

8 <sup>3</sup>Department of Molecular Microbiology and Immunology, Bloomberg School of Public Health,  
9 Johns Hopkins University, Baltimore, Maryland, USA; Key Lab of Molecular Virology,  
10 Institute of Medical Microbiology, Department of Infectious Diseases, Huashan Hospital,  
11 Fudan University, Shanghai, China

12

13 #These authors contributed equally to this work

14

15 **Running title:** Novel mutations associated with cycloserine resistance

16 **Key words:** cycloserine, mechanism of resistance, mutations, *Mycobacterium tuberculosis*

17

18 \*Corresponding author:

19 Jiazhen Chen, PhD, Email: [jiazhen\\_chen@163.com](mailto:jiazhen_chen@163.com)

20 Ying Zhang, MD, PhD, Email: [yzhang@jhsph.edu](mailto:yzhang@jhsph.edu)

21

22 **Abstract**

23 **Objectives** D-cycloserine (DCS) is an important second-line drug used to treat multi-drug

24 resistant (MDR) and extensively drug-resistant (XDR) tuberculosis. However, the

25 mechanisms of resistance to DCS are not well understood. Here we investigated the

26 molecular basis of DCS resistance using in vitro isolated resistant mutants of *Mycobacterium*

27 *tuberculosis*.

28 **Methods** *M. tuberculosis* H37Rv was subjected to mutant selection on 7H11 agar plates

29 containing varying concentrations of DCS. A total of 35 DCS-resistant mutants were isolated

30 and 18 mutants were subjected to whole genome sequencing. The identified mutations

31 associated with DCS resistance were confirmed by PCR-Sanger sequencing.

32 **Results** We identified mutations in 17 genes that are associated with DCS resistance. Except

33 mutations in *alr* (*rv3423c*) which is known to be involved in DCS resistance, 16 new genes

34 *rv0059*, *betP* (*rv0917*), *rv0221*, *rv1403c*, *rv1683*, *rv1726*, *gabD2* (*rv1731*), *rv2749*, *sugI*

35 (*rv3331*), *hisC2* (*rv3772*), single mutation in 5' intergenic region of *rv3345c* and *rv1435c*,

36 and insertion in 3' region of *rv0759c* were identified as solo mutations in their respective

37 DCS-resistant mutants. Our findings indicate that the mechanisms of DCS resistance are

38 more complex than previously thought and involve genes participating in different cellular

39 functions such as lipid metabolism, methyltransferase, stress response, and transport proteins.

40 **Conclusions** New mutations in diverse genes associated with DCS are identified, which shed

41 new light on the mechanisms of action and resistance of DCS. Future studies are needed to

42 verify these findings in clinical strains so that molecular detection of DCS resistance for

43 improved treatment of MDR-TB can be developed.

44

## 45 **Introduction**

46 D-Cycloserine (DCS) is a cyclic analog of D-alanine and is a broad-spectrum antibiotic that  
47 inhibits the growth of Gram-positive and Gram-negative bacteria. Although DCS has  
48 psychiatric and nervous system adverse reactions, it displays no cross-resistance with any  
49 other known antitubercular drugs <sup>1</sup>. DCS is an important second-line drug for the treatment of  
50 multi-drug resistant (MDR) and extensively drug-resistant (XDR) tuberculosis <sup>1</sup>, and is  
51 currently classified as a Group C agent for the treatment of MDR-TB treatment by WHO <sup>2</sup>.

52

53 Since DCS is a structural analog of D-alanine, enzymes whose substrates are D-alanine are  
54 the drug targets in mycobacteria <sup>3-5</sup>. These enzymes include D-alanine racemase (Alr) and d-  
55 alanine:d-alanine ligase (Ddl), which are required for the synthesis of peptidoglycan in the  
56 mycobacterial cell wall. Overexpression of *alr* and *ddl* has been shown to cause resistance to  
57 DCS in *M. smegmatis* <sup>6,7</sup>. Moreover, single nucleotide polymorphisms in these genes were  
58 also found in resistant *M. tuberculosis* <sup>8-10</sup>. Consistent with the cell wall peptidoglycan being  
59 a target of DCS, previous studies have shown that DCS competitively inhibits both Alanine  
60 racemase (Alr) and D-alanine-D-alanine ligase (Ddl) <sup>6,11</sup>. However, more recent metabolomic  
61 study showed that Ddl is a primary target of DCS that is preferentially inhibited over alanine  
62 racemase (Alr) in *M. tuberculosis* <sup>12</sup>. In addition, CycA is a transporter protein of D-alanine,  
63 D-serine and glycine D-serine/alanine/glycine <sup>13</sup>, and its single nucleotide polymorphism

64 (SNP) may partially contribute to the natural resistance to D-cycloserine in BCG<sup>10, 14</sup>. *ald*  
65 (*Rv2780*), encoding L-alanine dehydrogenase, was the fourth gene in *M. tuberculosis*, whose  
66 mutation was found in DCS resistant clinical isolates<sup>10</sup>. However, mutations in *cycA* and *ald*  
67 only contribute to very low level resistance, and Ddl mutation was rarely found in studies  
68 without known phenotype in MDR/XDR-TB strains<sup>10</sup>.

69

70 Despite the above progress and the significant advancements in general about the molecular  
71 understanding of drug resistance mechanisms in *M. tuberculosis*<sup>15</sup>, the distribution and  
72 characterization of DCS resistance in clinical strains are still vague. This is partly due to the  
73 technical difficulties with DCS susceptibility testing such that routine phenotypic assay is not  
74 performed in clinical labs<sup>16, 17</sup>, as well as poor understanding of the molecular basis of  
75 resistance to this drug.

76

77 To better understanding the mechanisms of DCS resistance and to develop more rapid  
78 molecular tests for detection of its resistance, we characterized 35 DCS-resistant mutants  
79 isolated in vitro from *M. tuberculosis* H37Rv and discovered a panel of new unique  
80 mutations that are associated with DCS resistance that have not previously been reported.

81

## 82 **Materials and methods**

83

### 84 **DCS resistant mutant isolation**

85 One-month-old *M. tuberculosis* H37Rv cultures grown in 7H9 liquid medium supplemented  
86 with 0.05% Tween 80 and 10% bovine serum albumin-dextrose-catalase (ADC) enrichment  
87 were plated on 7H11 plates containing 20, 40, 80, 160, 320 mg/L cycloserine. After  
88 incubation at 37°C for 4 weeks, the mutant colonies were picked to confirm the drug  
89 resistance phenotype by transferring the mutants onto new plates containing different  
90 concentrations of DCS (20, 40, 80, 160 mg/L).

91

## 92 **Drug susceptibility testing**

93 Drug susceptibility testing of the DCS-resistant mutants was performed on 7H11 agar plates  
94 containing 0, 20, 40, 80, 160 mg/L cycloserine. *M. tuberculosis* H37Rv was included as a  
95 drug-susceptible control and BCG was included as a resistant control. The susceptible strain  
96 H37Rv did not grow on DCS-containing plates and only mutants that were consistently  
97 resistant to DCS were further analyzed by PCR and whole genome sequencing (WGS), as  
98 described below.

99

## 100 **Whole genome sequencing analysis**

101 Genomic DNA from 18 cycloserine-resistant mutants, as well as the parent strain *M.*  
102 *tuberculosis* H37Rv, was sequenced using MiSeq (Illumina, Inc.) as described previously<sup>18</sup>,  
103 except that paired-end sequencing libraries were constructed using Nextera XT DNA Sample  
104 Preparation kits (Illumina, USA) following manufacturer's instruction. For each isolate, 500  
105 M to 1.5 G bases (110-fold to 350-fold genome coverage) sequences were generated after

106 barcodes were trimmed. Single-nucleotide variants (SNVs) and insertions and deletions  
107 (InDels) ranging from 1 to 5 bp were sorted and called at a minimum coverage of 4 reads  
108 using *M. tuberculosis* H37Rv genome (NC\_018143.1) as a reference. Mutations in PE/PPE  
109 family genes and regions having repetition sequences were excluded from the analysis.  
110 Mutations in the parent strain *M. tuberculosis* H37Rv comparing with the genome online  
111 (NC\_018143.1) were also excluded from the analysis.

112

### 113 **PCR and DNA sequencing**

114 The genomic DNA from DCS-resistant mutants isolated in vitro was then subjected to PCR  
115 amplification using primers listed in Table 1. The PCR products were obtained using the  
116 amplification parameters listed in Table 1 and sequenced by Sanger method to confirm the  
117 mutations in these genes in selected mutants.

118

## 119 **Results and discussion**

120

### 121 **Isolation of *M. tuberculosis* H37Rv mutants resistant to DCS**

122 The cycloserine MIC for the sensitive *M. tuberculosis* H37Rv parent strain was found to be  
123 below 20 mg/L. To isolate mutants resistant to DCS, about  $10^8$  *M. tuberculosis* bacteria were  
124 plated on 7H11 plates containing different concentrations of DCS (20, 40, 80, 160, 320  
125 mg/L). After 4 weeks of incubation, no mutants grew on plates containing DCS higher than  
126 80 mg/L. We found that only two mutants DT61-1 and DT69-1 grew on plates containing 40

127 mg/L cycloserine, and 35 mutants were obtained on plates containing 20 mg/L cycloserine.

128 The mutation frequency of resistant mutants to 20 mg/L cycloserine was found to be about 2

129  $\times 10^{-8}$ .

130

### 131 **Mutations identified in DCS resistant mutants by WGS**

132 WGS of 18 DCS resistant mutants showed that 16 isolates had only 1 mutation (SNV or

133 InDels) and 2 isolates had 2 mutations. Totally 17 different gene mutations were identified in

134 18 mutants (Table 2), and it is of interest to note that none of these mutations were dominant.

135 Nonsynonymous mutations in *alr* (*rv3423c*), *rv0059*, *betP* (*rv0917*), *rv0221*, *rv1403c*,

136 *rv1683*, *rv1726*, *gabD2* (*rv1731*), *rv2749*, *sugI* (*rv3331*), *hisC2* (*rv3772*), single mutation in

137 5' intergenic region of *rv3345c* and *rv1435c*, and insertion in 3' region of *rv0759c* were

138 identified as the solo mutation in their respective cycloserine-resistant mutants, suggesting

139 these mutations associated with cycloserine resistance are highly diverse. In addition, one

140 mutant (DT61-1) had two mutations in *alr* (*rv3423c*) as well as a -52 G-T change in *rv3345c*

141 (hypothetical protein), while the other mutant (DT3-2) had double mutations in both *rv2831*

142 and *rv3690* (Table 2). Ten mutation genes, *rv3690*, *rv0739c*, *rv1403c*, *rv1435c*, *rv2831*,

143 *rv1726*, *rv1731*, *rv3331*, *rv3772* and *alr* were verified by the Sanger sequencing method

144 using primers and PCR conditions as described in Table 1.

145

146 The two mutants DT61-1 and DT69-1 which had higher resistance to DCS (40 mg/L) had the

147 same nonsynonymous mutation in alanine racemase gene *alr*, (nucleotide change C1030T,

148 causing amino acid change of D344N). Except for *alr*, which is known to be involved in DCS  
149 resistance <sup>6, 7</sup>, the remaining 16 are novel and have not been reported previously. These 16  
150 mutations include 3 lipid metabolism (Rv0221, Rv1683, Rv2831), 2 transport proteins (BetP,  
151 SugI), 1 toxin/antitoxin (Rv0059), 3 intermediary metabolism and respiration (Rv1726, *gabD2*,  
152 HisC2), 1 methyltransferase (Rv1403c), 1 PE family protein (PE\_PGRS50), and 5 unknown  
153 hypothetical proteins (Rv0759c, Rv1435c, Rv2749, Rv3345c, Rv3690). *rv0059* is toxin of a  
154 TA-module (Rv0059 and Rv0060) <sup>19</sup>.

155

156 One mutant (DT21-5) had an N-terminal stop codon mutation in the *sugI* gene, which resulted  
157 in complete loss of its protein function (Table 2). The *sugI* encodes a probable sugar-transport  
158 integral membrane protein in *M. tuberculosis* <sup>20</sup>. Since the cycloserine structure is similar to  
159 natural furanose and *sugI* is the solo mutation detected in the genome, DCS could use SugI as  
160 the transporter for intake into the cell. The loss of function mutation in *sugI* could result in a  
161 lower uptake of cycloserine inside the cell and therefore leading to higher resistance to DCS.  
162 This is consistent with the previous observation that a transport protein involved in alanine and  
163 serine uptake was implicated in the uptake and resistance of DCS <sup>5</sup>. *betP* was the other transport  
164 protein whose SNV was detected in a different mutant DT71-1. BetP transports molecules with  
165 a quaternary ammonium group like betaine, carnitine and choline. Whether mutations in SugI  
166 and BetP could cause resistance through altering the transport of DCS remains further  
167 investigation in future studies.

168

169 Five genes encoding hypothetical proteins were identified in the mutants, including intergenic  
170 SNVs of *rv3345c*, *rv0759c* and *rv1435c*, and non-synonymous SNVs of *rv3690* and *rv2749*.  
171 *Rv3345c* seems to be a stress response protein, as it is regulated by *sigD* in strain H37Rv <sup>21</sup>.  
172 The mutation is located in the promoter region of *rv3345c*, which may alter its expression.  
173 *Rv3690* is a probable conserved membrane protein, and its expression was found to be elevated  
174 in MDR-TB strains <sup>22</sup>. Although the role of *rv0759c* is not known, *rv0759c* may be an important  
175 gene in stress response. The intergenic region of this gene was predicted to be directly bound  
176 by SigF, SigC and SigK <sup>23</sup>, and the control by SigF and SigH in heat stress were verified by Q-  
177 PCR <sup>24, 25</sup>. Future studies are needed to address the role of the 5 intergenic regions in genes  
178 involved in stress response and membrane proteins in causing DCS resistance.  
179  
180 *Rv1403c* together with *Rv1405c* are important methyltransferase in *M. tuberculosis*. Their  
181 expression was very low under *in vitro* non-stressed and *ex vivo* conditions, but highly  
182 upregulated under *in vivo* and stressed conditions *in vitro* <sup>26</sup>. They are both tightly regulated by  
183 the product of the *Rv1404* gene, encoding a member of the MarR family of transcriptional  
184 regulators and the stress condition upregulated their expression included acid shock, antibiotics  
185 like thioridazine, detergent like sodium dodecyl sulfate, hypoxic conditions and macrophage  
186 stress <sup>26-30</sup>. Mutation in *rv1403c* impaired its growth phenotype in acidified 7H9 medium  
187 (pH5.5) compared with the wild type strain <sup>30</sup>. *rv1726* encodes an FAD-binding dehydrogenase  
188 and its mutation was identified in 2 of 16 resistant mutants (DT81-2 and DT81-2-1) (Table 2).  
189 This oxidoreductase is structurally similar to 6-hydroxy-D-nicotine oxidase (6-HDNO) of

190 *Arthrobacter oxidans* (29.5% identity), which oxidizes 6-hydroxy-D-nicotine to 6-hydroxy-N-  
191 methylmyosmine.

192

193 *rv3772* encodes a histidinol-phosphate aminotransferase (HisC2), involved in the histidine-  
194 biosynthetic pathway. The pathway leads to enzymatic synthesis of histidine from 5-  
195 phosphoribosyl-1-pyrophosphate in ten steps, which is among the essential pathways required  
196 for optimal growth of *M. tuberculosis* and is conserved in archaea, bacteria, fungi and plants  
197 but not in mammals<sup>31,32</sup>. The gene was shown to be involved in the adaptation to stress  
198 response and host cell environment, as it is regulated by FurA, an oxidative stress sensing  
199 regulator, and upregulated by rhodanine agent (D157070) in *M.*

200 *avium* ssp. *paratuberculosis*<sup>33,34</sup>. *rv1731* encodes a succinate-semialdehyde dehydrogenase  
201 (GabD2), which catalyzes the NAD(P)<sup>+</sup>-coupled oxidation of succinic semialdehyde to  
202 succinate, the last step of the  $\gamma$ -aminobutyrate (GABA) shunt<sup>35</sup>.

203

204 Three non-synonymous mutations in 3 lipid metabolism genes, including *rv0221* encoding a  
205 verified triacylglycerol synthase<sup>36</sup>, *rv1683* encoding a long chain acyl-CoA synthase and  
206 *rv2831* encoding an enoyl-CoA hydratase were identified in 3 different mutants. *rv0221*  
207 belongs to the RD10 of *M. bovis* BCG and is located near LipC (*Rv0220*), lipW (*Rv0217c*),  
208 acyl-CoA synthetase (*Rv0214*), acyl-CoA dehydrogenase (*Rv0215c*), and an integral  
209 membrane acyltransferase (*Rv0228*). These genes may be cotranscribed under specific stimuli  
210 and may release fatty acid from triacylglycerol, carry out the transport of fatty acids and

211 catalyze the resynthesis of triacylglycerols in the pathogen<sup>36,37</sup>. *rv0221* was demonstrated  
212 up-regulated in intraphagosomal lesions and under multiple stresses<sup>38,39</sup>. The acyl-CoA  
213 synthase *Rv1683* is suspected to be essential for triacylglycerol hydrolysis and growth<sup>37,40</sup>,  
214 and was shown to be a functional esterase in all active, dormant and reactivation culture  
215 conditions<sup>41</sup>. *Rv2831* encodes an enoyl-CoA hydratase/isomerase family protein (EchA16),  
216 which is up-regulated in clinical MDR-TB strains and under exposure to mefloquine<sup>22,42</sup>. As  
217 the triacylglycerol storage is important for the bacteria to transform into the dormancy-like  
218 state *in vitro* and survive during starvation, these three genes could be involved in bacterial  
219 dormancy and prolonged survival under stress. In this study, the mutations in these lipid  
220 metabolism genes may alter their enzyme activity, turn the bacteria into dormancy and  
221 therefore increase the survival against cycloserine.

222

223 Previous studies have reported only a few isolated DCS mutants for identification of  
224 molecular basis of DCS resistance<sup>5,14</sup>. This study analyzed the largest number of DCS  
225 resistant mutants so far. It is worth noting that among the known DCS resistance associated  
226 genes, we only found a mutation in *alr* in 2 of 18 DCS-resistant mutants (11%) but in none of  
227 the other known DCS associated resistance genes *ddl*, or *cycA* or *ald*. Instead, we found  
228 mutations in 16 novel genes that are associated with DCS resistance. Our finding of *alr*  
229 mutation in DCS resistant mutants is consistent with a previous study that demonstrated *Alr*  
230 being a primary target of DCS<sup>8</sup> but is in contrast to a recent study suggesting *Ddl* being a  
231 target of DCS<sup>12,43</sup>. However, this could be a reflection of the relatively small number of

232 strains (18 mutants) being analyzed. Future investigations on more strains are required to  
233 better determine the frequency of the mutations in *alr*, *ddl*, as well as the new genes we  
234 identified in this work in DCS resistant clinical strains. In addition, the role of the 16 novel  
235 genes in DCS resistance should be addressed by molecular studies such as overexpression as  
236 well as point mutation constructions in future studies.

237

## 238 **Conclusions**

239 In conclusion, we identified novel mutations associated with DCS resistance in *M.*  
240 *tuberculosis*. Our findings indicate that the mechanisms of DCS resistance are quite complex  
241 in *M. tuberculosis* and involve genes in lipid metabolism, methyltransferase, stress response,  
242 small transport proteins. This study provides useful information for improved understanding  
243 of molecular basis of DCS resistance and mechanisms of action recognition and also  
244 molecular detection of DCS resistance for improved treatment of MDR-TB. Future studies  
245 are needed to validate our findings in clinical isolates with DCS resistance and to address the  
246 role of the newly identified mutations in causing DCS resistance in *M. tuberculosis*.

247

## 248 **Funding**

249 This work was supported in part by the Key Technologies Research and Development  
250 Program of China (2013ZX10003001-002), National Natural Science Foundation of China  
251 (81471987 and 81101226), and NIH grants AI99512 and AI108535.

252

## 253 **Transparency declarations**

254 None to declare.

255

## 256 **References**

- 257 1. Caminero JA, Sotgiu G, Zumla A et al. Best drug treatment for multidrug-resistant and  
258 extensively drug-resistant tuberculosis. *Lancet Infect Dis* 2010; **10**: 621-9.
- 259 2. WHO. WHO treatment guidelines for drug-resistant tuberculosis –2016 update. 2016.
- 260 3. Lambert MP, Neuhaus FC. Mechanism of D-cycloserine action: alanine racemase from  
261 *Escherichia coli* W. *J Bacteriol* 1972; **110**: 978-87.
- 262 4. Bruning JB, Murillo AC, Chacon O et al. Structure of the *Mycobacterium tuberculosis*  
263 D-alanine:D-alanine ligase, a target of the antituberculosis drug D-cycloserine. *Antimicrob*  
264 *Agents Chemother* 2011; **55**: 291-301.
- 265 5. David HL. Resistance to D-cycloserine in the tubercle bacilli: mutation rate and transport  
266 of alanine in parental cells and drug-resistant mutants. *Appl Microbiol* 1971; **21**: 888-92.
- 267 6. Feng Z, Barletta RG. Roles of *Mycobacterium smegmatis* D-alanine:D-alanine ligase and  
268 D-alanine racemase in the mechanisms of action of and resistance to the peptidoglycan  
269 inhibitor D-cycloserine. *Antimicrob Agents Chemother* 2003; **47**: 283-91.
- 270 7. Caceres NE, Harris NB, Wellehan JF et al. Overexpression of the D-alanine racemase  
271 gene confers resistance to D-cycloserine in *Mycobacterium smegmatis*. *J Bacteriol* 1997;  
272 **179**: 5046-55.
- 273 8. Awasthy D, Bharath S, Subbulakshmi V et al. Alanine racemase mutants of  
274 *Mycobacterium tuberculosis* require D-alanine for growth and are defective for survival in  
275 macrophages and mice. *Microbiology* 2012; **158**: 319-27.
- 276 9. Koser CU, Bryant JM, Becq J et al. Whole-genome sequencing for rapid susceptibility  
277 testing of *M. tuberculosis*. *N Engl J Med* 2013; **369**: 290-2.
- 278 10. Desjardins CA, Cohen KA, Munsamy V et al. Genomic and functional analyses of  
279 *Mycobacterium tuberculosis* strains implicate *ald* in D-cycloserine resistance. *Nat Genet*  
280 2016; **48**: 544-51.
- 281 11. Prosser GA, de Carvalho LP. Reinterpreting the mechanism of inhibition of  
282 *Mycobacterium tuberculosis* D-alanine:D-alanine ligase by D-cycloserine. *Biochemistry*  
283 2013; **52**: 7145-9.
- 284 12. Prosser GA, de Carvalho LP. Metabolomics Reveal d-Alanine:d-Alanine Ligase As the  
285 Target of d-Cycloserine in *Mycobacterium tuberculosis*. *ACS medicinal chemistry letters*  
286 2013; **4**: 1233-7.
- 287 13. Feher T, Cseh B, Umenhoffer K et al. Characterization of *cycA* mutants of *Escherichia*  
288 *coli*. An assay for measuring in vivo mutation rates. *Mutat Res* 2006; **595**: 184-90.
- 289 14. Chen JM, Uplekar S, Gordon SV et al. A point mutation in *cycA* partially contributes to  
290 the D-cycloserine resistance trait of *Mycobacterium bovis* BCG vaccine strains. *PLoS One*

- 291 2012; **7**: e43467.
- 292 15. Zhang Y, Yew WW. Mechanisms of drug resistance in *Mycobacterium tuberculosis*:  
293 update 2015. *Int J Tuberc Lung Dis* 2015; **19**: 1276-89.
- 294 16. Woods GL. Susceptibility testing for mycobacteria. *Clinical infectious diseases : an*  
295 *official publication of the Infectious Diseases Society of America* 2000; **31**: 1209-15.
- 296 17. Kam KM, Sloutsky A, Yip CW et al. Determination of critical concentrations of second-  
297 line anti-tuberculosis drugs with clinical and microbiological relevance. *Int J Tuberc Lung*  
298 *Dis* 2010; **14**: 282-8.
- 299 18. Zhang S, Chen J, Shi W et al. Mutations in *panD* encoding aspartate decarboxylase are  
300 associated with pyrazinamide resistance in *Mycobacterium tuberculosis*. *Emerg Microbes*  
301 *Infect* 2013; **2**: e34.
- 302 19. Sala A, Bordes P, Genevaux P. Multiple toxin-antitoxin systems in *Mycobacterium*  
303 *tuberculosis*. *Toxins* 2014; **6**: 1002-20.
- 304 20. Titgemeyer F, Amon J, Parche S et al. A genomic view of sugar transport in  
305 *Mycobacterium smegmatis* and *Mycobacterium tuberculosis*. *J Bacteriol* 2007; **189**: 5903-15.
- 306 21. Raman S, Hazra R, Dascher CC et al. Transcription regulation by the *Mycobacterium*  
307 *tuberculosis* alternative sigma factor SigD and its role in virulence. *J Bacteriol* 2004; **186**:  
308 6605-16.
- 309 22. Phong TQ, Ha do TT, Volker U et al. Using a Label Free Quantitative Proteomics  
310 Approach to Identify Changes in Protein Abundance in Multidrug-Resistant *Mycobacterium*  
311 *tuberculosis*. *Indian journal of microbiology* 2015; **55**: 219-30.
- 312 23. Rodrigue S, Brodeur J, Jacques PE et al. Identification of mycobacterial sigma factor  
313 binding sites by chromatin immunoprecipitation assays. *J Bacteriol* 2007; **189**: 1505-13.
- 314 24. Hartkoorn RC, Sala C, Uplekar S et al. Genome-wide definition of the SigF regulon in  
315 *Mycobacterium tuberculosis*. *J Bacteriol* 2012; **194**: 2001-9.
- 316 25. Sharp JD, Singh AK, Park ST et al. Comprehensive Definition of the SigH Regulon of  
317 *Mycobacterium tuberculosis* Reveals Transcriptional Control of Diverse Stress Responses.  
318 *PLoS One* 2016; **11**: e0152145.
- 319 26. Dutta NK, Mehra S, Kaushal D. A *Mycobacterium tuberculosis* sigma factor network  
320 responds to cell-envelope damage by the promising anti-mycobacterial thioridazine. *PLoS*  
321 *One* 2010; **5**: e10069.
- 322 27. Golby P, Nunez J, Cockle PJ et al. Characterization of two in vivo-expressed  
323 methyltransferases of the *Mycobacterium tuberculosis* complex: antigenicity and genetic  
324 regulation. *Microbiology* 2008; **154**: 1059-67.
- 325 28. Pang X, Vu P, Byrd TF et al. Evidence for complex interactions of stress-associated  
326 regulons in an *mprAB* deletion mutant of *Mycobacterium tuberculosis*. *Microbiology* 2007;  
327 **153**: 1229-42.
- 328 29. Rustad TR, Harrell MI, Liao R et al. The enduring hypoxic response of *Mycobacterium*  
329 *tuberculosis*. *PLoS One* 2008; **3**: e1502.
- 330 30. Healy C, Golby P, MacHugh DE et al. The MarR family transcription factor Rv1404  
331 coordinates adaptation of *Mycobacterium tuberculosis* to acid stress via controlled expression  
332 of Rv1405c, a virulence-associated methyltransferase. *Tuberculosis (Edinb)* 2016; **97**: 154-

- 333 62.
- 334 31. Alifano P, Fani R, Lio P et al. Histidine biosynthetic pathway and genes: structure,  
335 regulation, and evolution. *Microbiol Rev* 1996; **60**: 44-69.
- 336 32. Sasseti CM, Boyd DH, Rubin EJ. Genes required for mycobacterial growth defined by  
337 high density mutagenesis. *Mol Microbiol* 2003; **48**: 77-84.
- 338 33. Eckelt E, Meissner T, Meens J et al. FurA contributes to the oxidative stress response  
339 regulation of Mycobacterium avium ssp. paratuberculosis. *Front Microbiol* 2015; **6**: 16.
- 340 34. Bull TJ, Linedale R, Hinds J et al. A rhodanine agent active against non-replicating  
341 intracellular Mycobacterium avium subspecies paratuberculosis. *Gut pathogens* 2009; **1**: 25.
- 342 35. Tian J, Bryk R, Itoh M et al. Variant tricarboxylic acid cycle in Mycobacterium  
343 tuberculosis: identification of alpha-ketoglutarate decarboxylase. *Proc Natl Acad Sci U S A*  
344 2005; **102**: 10670-5.
- 345 36. Daniel J, Deb C, Dubey VS et al. Induction of a novel class of diacylglycerol  
346 acyltransferases and triacylglycerol accumulation in Mycobacterium tuberculosis as it goes  
347 into a dormancy-like state in culture. *J Bacteriol* 2004; **186**: 5017-30.
- 348 37. Elamin AA, Stehr M, Singh M. Lipid Droplets and Mycobacterium leprae Infection.  
349 *Journal of pathogens* 2012; **2012**: 361374.
- 350 38. Deb C, Lee CM, Dubey VS et al. A novel in vitro multiple-stress dormancy model for  
351 Mycobacterium tuberculosis generates a lipid-loaded, drug-tolerant, dormant pathogen. *PLoS*  
352 *One* 2009; **4**: e6077.
- 353 39. Schnappinger D, Ehrt S, Voskuil MI et al. Transcriptional Adaptation of Mycobacterium  
354 tuberculosis within Macrophages: Insights into the Phagosomal Environment. *J Exp Med*  
355 2003; **198**: 693-704.
- 356 40. Low KL, Shui G, Natter K et al. Lipid droplet-associated proteins are involved in the  
357 biosynthesis and hydrolysis of triacylglycerol in Mycobacterium bovis bacillus Calmette-  
358 Guerin. *J Biol Chem* 2010; **285**: 21662-70.
- 359 41. Tallman KR, Levine SR, Beatty KE. Small-Molecule Probes Reveal Esterases with  
360 Persistent Activity in Dormant and Reactivating Mycobacterium tuberculosis. *ACS infectious*  
361 *diseases* 2016; **2**: 936-44.
- 362 42. Montezano D, Meek L, Gupta R et al. Flux Balance Analysis with Objective Function  
363 Defined by Proteomics Data-Metabolism of Mycobacterium tuberculosis Exposed to  
364 Mefloquine. *PLoS One* 2015; **10**: e0134014.
- 365 43. Halouska S, Fenton RJ, Zinniel DK et al. Metabolomics analysis identifies d-Alanine-d-  
366 Alanine ligase as the primary lethal target of d-Cycloserine in mycobacteria. *J Proteome Res*  
367 2014; **13**: 1065-76.

368

369

370

371

372 **Table 1. Primers and PCR conditions used to verify gene mutations in DCS resistant**  
 373 **mutants**

| Genes   | primers             | sequence (5'-3')                 | condition      |
|---------|---------------------|----------------------------------|----------------|
| alr     | <b>alr_F2</b>       | GAAAATAAAAGACACGCCTACTTTTCGCTCCA |                |
|         | <b>alr_R2+300bp</b> | GACATCCATCGCCATGGCAATACCCTT      |                |
| rv0759c | <b>Rv0759c-For</b>  | AAAGCCGAAATCACTGAGGCTGCGGG       |                |
|         | <b>Rv0759c-Rev</b>  | TAAGGAGGCCGTCGGCGCCTTCTTC        |                |
| rv1403c | <b>Rv1403c-For</b>  | AATTCGCCGGCGCTAAACGGGAGG         |                |
|         | <b>Rv1403c-Rev</b>  | ATCAGTTCGGCGCCGACCAACCG          | 95°C for 5min; |
| rv1435c | <b>Rv1435c-For</b>  | AGCCGCCGCGTCCGGGCTTAA            | 35 turns of    |
|         | <b>Rv1435c-Rev</b>  | AGGCCCGGTAGAAGTTGCGTCCGAT        | 94°C for 30s,  |
| rv1726  | <b>Rv1726-F</b>     | AGTACTGGCCGTACGGCTGCA            | 62°C for 30s,  |
|         | <b>Rv1726-R</b>     | GAGGAGTAGCTGTCGGCTTCTATCG        | 72°C for 90s;  |
| rv1731  | <b>Rv1731-For</b>   | GGCCGGTTCTTCGTGGTAACGTGCC        | and finally    |
|         | <b>Rv1731-Rev</b>   | CTGTGCCTTACGGGGCTTCAGCAGG        | 72°C for 5min  |
| rv2831  | <b>Rv2831-F</b>     | GCCACTTCATCAAGCAAGGAGAG          |                |
|         | <b>Rv2831-R</b>     | CTCTTCAACAGCCGCACCGAG            |                |
| rv3331  | <b>Rv3331-For</b>   | AACTGATCGAACCCGACCCGTCGC         |                |
|         | <b>Rv3331-Rev</b>   | CCGTGGTGGTCAGCAACTCCTGTTCTC      |                |
| rv3690  | <b>Rv3690-F</b>     | GTATTGCAGACCGGCTTAGAAGCC         |                |

**Rv3690-R** GTCAAATAGGTGCCGATCGAGG

---

**Rv3772-For** TGAGCTACGGGCGCTTGTCTTCAGTTG

rv3772

**Rv3772-Rev** GTGTGGTCGGTCAACGGCACCTGGA

---

374

375

376 **Table 2. Mutations identified in cycloserine resistant mutants of *M. tuberculosis* by**  
 377 **whole genome sequencing analysis**

| Number | Strain ID | MIC to<br>cycloserin<br>e (mg/L) | Mutation type           | Locus_tag            | Nucleotides<br>mutation | Amino<br>acid<br>change | Gene product                                                        |
|--------|-----------|----------------------------------|-------------------------|----------------------|-------------------------|-------------------------|---------------------------------------------------------------------|
| DT69-1 | DT69-1    | 40                               | Nonsyn                  | <i>alr (rv3423c)</i> | C1030T                  | D344N                   | Alanine racemase                                                    |
| DT61-1 | DT61-1    | 40                               | Intergenic SNV          | <i>rv3345c</i>       | G(-52)T                 | -                       | Hypothetical protein                                                |
|        |           |                                  | Nonsyn                  | <i>alr (rv3423c)</i> | C1030T                  | D344N                   | alanine racemase                                                    |
| No.18  | DT16-2    | 20                               | Nonsyn                  | <i>rv0059</i>        | C278T                   | A93V                    | Hypothetical protein<br>(heterogeneous)                             |
| No.9   | DT63-1    | 20                               | Nonsyn                  | <i>rv0221</i>        | C166T                   | P56S                    | Acyltransferase,<br>WS/DGAT/MGAT<br>(heterogeneous)                 |
| No.12  | DT72-1    | 20                               | Intergenic<br>insertion | <i>Rv0759c</i>       | (-27) Ins C             | -                       | Hypothetical protein                                                |
| DT71-1 | DT71-1    | 20                               | Nonsyn                  | <i>betP (rv0917)</i> | T941G                   | L314R                   | Betaine carnitine choline<br>transporter BCCT family<br>transporter |
| No.8   | DT1-1     | 20                               | Nonsyn                  | <i>rv1403c</i>       | T19C                    | T7A                     | Methyltransferase                                                   |
| No.15  | DT76-1    | 20                               | Intergenic SNV          | <i>rv1435c</i>       | T(-150)C                | -                       | Hypothetical protein                                                |
| No.19  | DT82-4    | 20                               | Intergenic SNV          | <i>rv1435c</i>       | T(-150)C                | -                       | Hypothetical protein                                                |

|        |          |    |                |                                        |         |        |                                                                  |
|--------|----------|----|----------------|----------------------------------------|---------|--------|------------------------------------------------------------------|
| DT15-2 | DT15-2   | 20 | Nonsyn         | <i>rv1683</i>                          | G1126A  | A376T  | Long chain acyl-CoA synthase                                     |
| No.1   | DT81-2-1 | 20 | Nonsyn         | <i>rv1726</i>                          | T440C   | V147A  | Oxidoreductase                                                   |
| DT81-2 | DT81-2   | 20 | Nonsyn         | <i>rv1726</i>                          | T440C   | V147A  | Oxidoreductase                                                   |
| No.16  | DT79-6   | 20 | Nonsyn         | <i>gabD2</i><br>( <i>rv1731</i> )      | A92C    | E31A   | Succinate-semialdehyde dehydrogenase                             |
| No.4   | DT9-1    | 20 | Nonsyn         | <i>rv2749</i>                          | C4T     | P2S    | Hypothetical protein (heterogeneous)                             |
| No.13  | DT21-5   | 20 | Nonsyn         | <i>sugI</i> ( <i>rv3331</i> )          | C16T    | Q6stop | Sugar-transport integral membrane protein, sugI, MFS transporter |
| DT6-6  | DT6-6    | 20 | Intergenic SNV | <i>PE_PGRS50</i><br>( <i>rv3345c</i> ) | G(-52)T | -      | PE family                                                        |
| DT3-2  | DT3-2    | 20 | Nonsyn         | <i>rv3690</i>                          | G103A   | D35N   | Hypothetical protein                                             |
|        |          |    | Nonsyn         | <i>echA16</i><br>( <i>rv2831</i> )     | G253T   | A85S   | Enoyl-CoA hydratase                                              |
| No.5   | DT12-2   | 20 | Nonsyn         | <i>HisC2</i><br>( <i>rv3772</i> )      | T110C   | L37P   | Histidinol-phosphate aminotransferase (heterogeneous)            |

378

379
